1 **Full title**

2 **Q203 containing fully intermittent oral regimens exhibited high**  
3 **sterilizing activity against *Mycobacterium ulcerans* in mice**

4  
5 **Short title**

6 **Q203 intermittent and oral treatment against *Mycobacterium***  
7 ***ulcerans* in mice**

8  
9 Aurélie Chauffour<sup>1\*</sup>, Jérôme Robert<sup>1,2</sup>, Nicolas Veziris<sup>1,2,3</sup>, Alexandra Aubry<sup>1,2</sup>, Kevin  
10 Pethe<sup>4,5</sup>, Vincent Jarlier<sup>1,2</sup>

11  
12 1- Sorbonne Université, INSERM, U1135, Centre d'Immunologie et des Maladies  
13 Infectieuses (CIMI-Paris), Paris, France

14 2- Centre National de Référence des Mycobactéries et de la Résistance des  
15 Mycobactéries aux Antituberculeux, Laboratoire de Bactériologie-Hygiène, Groupe  
16 hospitalier APHP. Sorbonne Université, Site Pitié-Salpêtrière, Paris, France

17 3- Département de Bactériologie, Groupe hospitalier APHP. Sorbonne Université, Site  
18 Saint-Antoine, Paris, France

19 4- Lee Kong Chian School of Medicine, Nanyang Technological University,  
20 Experimental Medicine Building, Singapore 636921, Singapore

21 5- School of Biological Sciences, Nanyang Technological University, Singapore  
22 637551, Singapore

23

24 \*Corresponding author

25 E-mail: [aurelie.chauffour@sorbonne-universite.fr](mailto:aurelie.chauffour@sorbonne-universite.fr)

26

27 **Abstract**

28

29 Buruli ulcer (BU), caused by *Mycobacterium ulcerans* is currently treated by a daily  
30 combination of rifampin and either injectable streptomycin or oral clarithromycin. An  
31 intermittent oral regimen would facilitate the treatment supervision. We first evaluated  
32 the bactericidal activity of newer antimicrobials against *M. ulcerans* using a BU animal  
33 model. The imidazopyridine amine Q203 exhibited high bactericidal activity whereas  
34 tedizolid (oxazolidinone close to linezolid), selamectine and ivermectine (avermectine  
35 compound) and the benzothiazinone PBTZ169 were not active. Consequently, Q203  
36 was evaluated for its bactericidal and sterilizing activities in combined intermittent  
37 regimens. Q203 given twice a week in combination with one of the other long half-life  
38 compounds, rifapentine or bedaquiline, sterilized the mice footpads in 8 weeks, i.e.  
39 after a total of only 16 doses, and prevented relapse during a period of 20 weeks after  
40 stopping the treatment. These results are very promising for future intermittent oral  
41 regimens which would greatly simplify BU treatments in the field.

42

## 43 **Author summary**

44 The current treatment of Buruli ulcer (BU), infection caused by *Mycobacterium*  
45 *ulcerans* is based on a daily antibiotic combination of rifampin associated with  
46 streptomycin or clarithromycin. A shorter or intermittent treatment without an injectable  
47 drug would clearly simplify the management on the field. We evaluated the bactericidal  
48 activity of several new antimicrobials drugs in a mice model of BU and found that the  
49 Q203 exhibited the highest bactericidal effect. We subsequently identified new  
50 antibiotic combinations containing Q203 with high sterilizing activity when  
51 administrated twice a week for 8 weeks.

## 52 **Introduction**

53 Buruli ulcer (BU), caused by *Mycobacterium ulcerans*, was only treated by surgery until  
54 2004. The first medical treatment recommended by the World Health Organization  
55 (WHO). was a daily eight-week treatment based on an association of two antibiotics,  
56 rifampin (RIF), an oral ansamycin, and streptomycin (STR) an injectable  
57 aminoglycoside [1]. Currently a promising fully oral regimen combining RIF and  
58 clarithromycin (CLR), a macrolide compound [2,3] is tested clinically at a large scale  
59 (NCT01659437, [clinicaltrials.gov](http://clinicaltrials.gov)).

60 The oral RIF-CLR combination has been promoted to suppress toxic effects and  
61 injections with aminoglycosides, resulting in better patients adherence and safety.  
62 Nevertheless, this combination is given daily during eight weeks. Shorter or intermittent  
63 treatment would facilitate adherence and the supervision by healthcare workers. For  
64 instance, many Buruli ulcer patients with small-to-moderate size wounds are on  
65 ambulatory care, and visit healthcare centres twice or three times per week for dressing  
66 changes, a rhythm that could allow receiving supervised intermittent antibiotic  
67 administration.

68 Our main objective was to identify alternative oral regimens active against BU by using  
69 a validated BU animal model. As a first step, we screened several new drug candidates  
70 for their *in vivo* bactericidal activity against *M. ulcerans*. Based on available data on  
71 activity against *M. tuberculosis* or *M. ulcerans*, the following compounds, with either  
72 short or long half-life, were selected as potentially interesting: selamectin (SEL) and  
73 ivermectin (IVE), two drugs from the avermectin family with antiparasitic properties [4–  
74 6]; tedizolide (TDZ) [7], a new oxazolidinone sharing the same mechanism of action as  
75 linezolid (LZD), a drug active against *M. ulcerans* [8] but exhibiting higher solubility and

76 bioavailability than LNZ [9]; the 2-piperazino-benzothiazinone 169 (PBTZ), shown to  
77 be highly active against *M. tuberculosis* [10,11]; the imidazopyridine amine Q203 that  
78 targets the cytochrome bc1-aa3 respiratory terminal oxidase in *M. tuberculosis* and  
79 recently shown to prevent mortality and reduce CFU counts in the footpad of mice  
80 infected with *M. ulcerans* [12].

81 Because the first step screening demonstrated that Q203 was the compound with the  
82 highest bactericidal activity, and because of the long half-life of this compound, we  
83 measured in a second experiment the bactericidal and sterilizing activity of intermittent  
84 regimens containing Q203 combined with rifapentine or bedaquiline, other antibiotics  
85 with long half-life and already known to be active against *M. ulcerans*.

## 86 **Methods**

### 87 **Infection of mice with *M. ulcerans***

88 Respectively 190 and 390 4 weeks-old female balb/c/j mice were used in the 1<sup>st</sup> and  
89 the 2<sup>nd</sup> experiment (Janvier Labs, Le Genest Saint-Isle, France). Mice were inoculated  
90 according to the Shepard method [13] in the left hind footpad with 0.03 ml of a bacterial  
91 suspension containing around 5 log<sub>10</sub> Colony Forming Unit (CFU) of the *M. ulcerans*  
92 strain Cu001 (5.02 and 4.6 log<sub>10</sub> in the 1<sup>st</sup> and 2<sup>nd</sup> experiment, respectively). This strain,  
93 isolated in 1996 from a Buruli ulcer patient in Adzopé, Ivory Coast [14], was kindly  
94 provided by the local laboratory without any identification data regarding the patient.  
95 The strain is susceptible to all drugs used in BU treatment and was maintained in our  
96 lab by regular passage into mice footpad.

### 97 **Treatment of mice**

98 The treatment was initiated when the infection was well established, *i.e.* when the mice  
99 footpad swelling reached grades 2 (inflammatory swelling limited to the inoculated

100 footpad) to 3 (inflammatory swelling involving the entire inoculated footpad) on a 4-  
101 grade ladder [15]. This stage of infection was reached six weeks after the inoculation.  
102 The mice were randomly allocated into eight groups (1<sup>st</sup> experiment) and ten groups  
103 (2<sup>nd</sup> experiment) using a randomization table (randomization.com).

104 The groups were as follows (drug, dosage, number of doses/week):

105 1<sup>st</sup> experiment: one untreated control group of 30 mice and seven treated groups of 20  
106 mice each treated with either tedizolide (TDZ) 10mg/kg 5/7, linezolid (LZD) 100mg/kg  
107 5/7, selamectine (SEL) 12mg/kg 1/7, ivermectine (IVE) 1mg/kg 5/7, Q203 5mg/kg 5/7,  
108 2-piperazino-benzothiazinone 169 (PBTZ) 25mg/kg 5/7 or, as controls, rifampin (RIF)  
109 10 mg/kg 5/7, alone or combined with streptomycin (STR) 150 mg/kg.

110 2<sup>nd</sup> experiment: one untreated control group of 27 mice, five groups of 27 mice each  
111 treated with monotherapy by RIF 10 mg/kg 5/7, rifapentine (RPT) 20mg/kg 2/7,  
112 bedaquiline (BDQ) 25 mg/kg 5/7 or Q203 5mg/kg 5/7 or 2/7; and 4 groups of 57 mice  
113 each treated with combined therapies Q203-RIF 5/7, Q203-RPT 2/7, Q203-BDQ 2/7  
114 and RIF-clarithromycin (CLR) 100 mg/kg 5/7 as control.

115 LZD was purchased from Pfizer, France; SEL and IVE from Merck, France; RIF from  
116 Sandoz, France; STR from Panpharma, France; and CLR from Abbott, France. TDZ  
117 was kindly provided by MSD-MERCK group, BDQ by Janssen Pharmaceutica and  
118 PBTZ by Stewart Cole (Ecole Polytechnique Fédérale de Lausanne, Switzerland).  
119 Q203 was custom-synthesized at GVKBio.

120 Antibiotics were re-suspended in 0.05% agar-distilled water except for STR, which was  
121 diluted in normal saline, Q203 in 1% DMSO-20% TPGS (D- $\alpha$ -Tocopherol polyethylene  
122 glycol 1000 succinate) and PBTZ in a solution of 1% carboxyl-methylcellulose-1%  
123 Tween 80. BDQ was directly provided by Janssen Pharmaceutica in a 20%  
124 hydropropyl- $\beta$ -cyclodextrin formulation.

125 Treatment regimens were administered during 4 or 8 weeks in both experiments and  
126 all drugs were orally administered by gavage in a final volume of 0.2 ml, except STR,  
127 which was injected subcutaneously under the same volume.

### 128 **Assessment of *M. ulcerans* infection and effectiveness of treatment**

129 Two methods were used for assessing the development of *M. ulcerans* infection and  
130 the effect of treatments: (i) clinical method by weekly evaluation of the lesion index as  
131 previously described [15], and (ii) bacteriological method by cultivating *M. ulcerans*  
132 from mice footpad. For CFU enumeration in footpads, mice were sacrificed by cervical  
133 dislocation as recommended by the European directive 2010/63 and the French  
134 decree n°2013-118. Mice footpads were removed aseptically and grinded in a Hank's  
135 balanced salt solution under a final volume of 2 ml in an organ grinder (Octo Dissociator  
136 GentleMACS, Miltenyi®). Suspensions were then plated onto Lowenstein-Jensen (LJ)  
137 tubes containing Vancomycin 10µg/ml, Colistin 40µg/ml and B Amphotericin 10µg/ml  
138 to limit contamination. For untreated control groups, suspensions were serially diluted  
139 in 10-fold steps from pure to 10<sup>-4</sup> and 0.1 ml of the dilutions were plated in duplicate  
140 on LJ-media whereas for the treated groups, the entire volume of the footpad  
141 suspension was plated onto 10 LJ-media with 0.2 ml each. All tubes were incubated at  
142 30°C for 90 days.

143 In the 1<sup>st</sup> experiment, lesion index of the footpads were measured during the 8 weeks  
144 period of treatment and CFU were numerated at week 4 and 8. In the 2<sup>nd</sup> experiment,  
145 lesion index of the footpads were measured during the 8 weeks period of treatment  
146 and CFU were numerated at week 2, 4 and 8. Moreover, in the latter experiment, 30  
147 mice that had been treated during 8 weeks with combined therapies were held without  
148 treatment during an additional period of 20 weeks to monitor relapses of *M. ulcerans*



149 infection; lesion index were measured during this period and CFU were numerated at  
150 the end of the observation period.

### 151 **MIC determination**

152 In order to assess a possible acquisition of resistance to the antibiotics used during  
153 treatment, MICs of the antibiotics used for the treatment were determined against the  
154 bacilli isolated from relapsing mice during the observation period and the initial strain  
155 Cu001. The strains were suspended in distilled water and the turbidity was adjusted to  
156 Mac Farland 3 (1 mg/ml). RIF and CLR were tested on a 7H11 + 10% OADC (Oleic-  
157 Acid-Dextrose-Catalase) medium (pH 7.4) and CLR was tested also on Mueller Hinton  
158 medium (pH 6.6). RIF was dissolved in dimethylformamide and CLR in distilled water,  
159 then twofold diluted in their own solvent and incorporated to the culture-media to obtain  
160 a final concentration ranging from 4 to 0.12 µg/ml. 0.1 ml of two distinct bacilli  
161 suspensions (pure and 10<sup>-2</sup>) were plated onto drug-containing-media and drug-free  
162 media used as a growth control. All media were incubated at 30°C and examined after  
163 60 and 90 days.

### 164 **Statistical analysis**

165 The Mann-Whitney test was used to analyze the results. A p-value<0.05 was  
166 considered as statistically significant. A regimen was considered to be bactericidal if  
167 its mean value of CFU per footpad was significantly lower than the mean value of CFU  
168 per footpad of the untreated group.

### 169 **Ethic statement**

170 Experiment project was favorably evaluated by the ethic committee n°005 Charles  
171 Darwin localized at the Pitié-Salpêtrière Hospital and clearance was given by the  
172 French Ministry of Education and Research under the number APAFIS#9576-

173 20170301171176185 v2. Our animal facility received in April 27<sup>th</sup> 2017 authorization  
174 to carry out animal experiments with the license number C-75-13-01. The persons who  
175 carried out the animal experiments had followed a specific training recognized by the  
176 French Ministry of Education and Research.

177

## 178 **Results**

### 179 **1<sup>st</sup> experiment**

180 **Evolution of the footpad lesions (Fig 1).** The mean lesion index (MLI) was 2.8 at the  
181 start of the treatment. Footpads of untreated control mice swollen from MLI 2.8 to 4  
182 after 2 weeks and mice had to be sacrificed at week 4 due to advanced lesions. MLIs  
183 in RIF containing control groups increased to 3.8 after one week and then decreased  
184 to remain stable at 3.4 and decreased to 2 in RIF-STR group. MLIs in the SEL, IVE,  
185 TDZ and PBTZ groups continued to increase and mice had to be sacrificed at week 4  
186 due to advanced lesions. In contrast, MLI in the Q203 treated group decreased to 1.9  
187 after 1 week of treatment and to 1.2 after 8 weeks.

188 **Fig 1. First experiment: Evolution of the mean lesion index of the swelling footpad of mice infected with *M. ulcerans* during**

189 **8 weeks of treatment.**

190 Doses were as follow: Rifampin (RIF) 10mg/kg; Streptomycine (STR) 150mg/kg; Tedizolide (TDZ) 10mg/kg; Linezolid (LZD)

191 100mg/kg; Selamectine (SEL) 12 mg/kg; Ivermectine (IVE) 1 mg/kg; Q203 5mg/kg; PBT169 25mg/kg

192 **Evolution of the CFU counts (Table 1).** All untreated mice had culture-positive  
193 footpads at the time of treatment start with a mean of  $6.93 \pm 0.20 \log_{10}$  CFUs, value  
194 that remained unchanged at week 4. All mice remained culture positive after 4 weeks  
195 of treatment in the RIF control-groups but the mean CFU counts was significantly lower  
196 ( $p < 0.05$ ) than that in the untreated mice group ( $4.58 \pm 1.29 \log_{10}$  for RIF and  $2.15 \pm$   
197  $1.20 \log_{10}$  for RIF-STR, respectively). After 8 weeks of treatment, only 2 out of 8 mice  
198 in the RIF groups remained culture positive with a low mean CFU counts ( $< 1 \log_{10}$ ).  
199 After 4 weeks of treatment, all the mice were culture positive in the TDZ, SEL, IVE and  
200 PBTZ groups, with CFU counts not statistically different from those in the untreated  
201 control group. Due to advanced footpads lesions and mortality of mice, the evaluation  
202 point initially planned at week 8 was cancelled for these groups. After 4 weeks of  
203 treatment, 3/10 mice were already culture negative in the Q203 treated group with a  
204 low mean CFU count ( $1.14 \pm 1.30 \log_{10}$ ), i.e. different ( $p < 0.001$ ) from those in the RIF-  
205 containing group. After 8 weeks of treatment, all mice were culture negative in the  
206 Q203 group.

207 **Table 1.** *First experiment: Results of footpad cultures during the treatment of mice infected with M. ulcerans.*

| Regimen <sup>a</sup>     | Results during treatment |                                |                         |                                |                         |                                |
|--------------------------|--------------------------|--------------------------------|-------------------------|--------------------------------|-------------------------|--------------------------------|
|                          | D0                       |                                | 4w                      |                                | 8w                      |                                |
|                          | Culture positivity rate  | Mean ( $\pm$ SD) CFU per group | Culture positivity rate | Mean ( $\pm$ SD) CFU per group | Culture positivity rate | Mean ( $\pm$ SD) CFU per group |
| <b>Untreated control</b> | 10/10                    | 6,93 $\pm$ 0,20                | 13/13 <sup>b</sup>      | 6,81 $\pm$ 0,36                |                         |                                |
| <b>RIF 5/7</b>           |                          |                                | 9/9 <sup>d</sup>        | 4,58 $\pm$ 1,29                | 2/8 <sup>d</sup>        | 0,47 $\pm$ 1,16                |
| <b>RIF-STR 5/7</b>       |                          |                                | 8/8 <sup>e</sup>        | 2,15 $\pm$ 1,20                | 3/9 <sup>e</sup>        | 0,57 $\pm$ 0,90                |
| <b>TDZ 5/7</b>           |                          |                                | 7/7 <sup>f</sup>        | 6,35 $\pm$ 0,59                | <sup>g</sup>            |                                |
| <b>LZD 5/7</b>           |                          |                                | 10/10                   | 2,83 $\pm$ 0,62                | 9/10                    | 1,87 $\pm$ 1,11                |
| <b>SEL 1/7</b>           |                          |                                | 4/4 <sup>h</sup>        | 6,24 $\pm$ 0,82                | <sup>g</sup>            |                                |
| <b>IVE 5/7</b>           |                          |                                | 8/8 <sup>i</sup>        | 6,30 $\pm$ 0,82                | <sup>g</sup>            |                                |
| <b>Q203 5/7</b>          |                          |                                | 7/10                    | 1,14 $\pm$ 1,30                | 0/10                    |                                |
| <b>PBTZ169 5/7</b>       |                          |                                | 7/7 <sup>j</sup>        | 7,08 $\pm$ 0,64                | <sup>g</sup>            |                                |

208

209 <sup>a</sup>: treatment began 6 weeks after inoculation of 5.02 log<sub>10</sub> per footpad when the infected swelling footpads reached a lesion index  
 210 between 2 and 3.

211 Drugs were administered 5 times a week except for the selamectine group with 1 time a week. Dosages were as follow: Rifampin  
 212 (RIF) 10mg/kg; Streptomycine (STR) 150mg/kg; Tedizolide (TDZ) 10mg/kg; Linezolid (LZD) 100mg/kg; Selamectine (SEL) 12 mg/kg;  
 213 Ivermectine (IVE) 1 mg/kg; Q203 5mg/kg; PBT169 25mg/kg.

214 <sup>b</sup>: due to advanced lesion, all mice from the untreated control group were in fact sacrificed at 3 weeks; despite that, footpad cultures  
215 were contaminated for 7 out 20 mice.

216 <sup>d</sup>: 3 mice died in the RIF groups due to an accident of gavage.

217 <sup>e</sup>: 3 mice died in the RIF-STR groups due to an accident of gavage.

218 <sup>f</sup>: footpad cultures were contaminated due to advanced lesion for 3 mice.

219 <sup>g</sup>: cultures at week 8 were not performed due to advanced necrotized lesion in footpads.

220 <sup>h</sup>: 5 mice died from *M.ulcerans* infection and footpad cultures were contaminated due to advanced lesion for 1 mouse.

221 <sup>i</sup>: 1 mouse died from *M.ulcerans* infection and footpad cultures were contaminated due to advanced lesion for 1 mouse.

222 <sup>j</sup>: footpad cultures were contaminated due to advanced lesion for 3 mice.

223 **2nd experiment**

224 **Evolution of the footpad lesions (Fig 2).** The MLI was 3 at the start of the treatment.  
225 Footpads of untreated control mice swollen from MLI 3 to 4 after 2 weeks and mice  
226 had to be sacrificed at week 4 due to advanced lesions. MLIs in RIF, RPT and BDQ  
227 treated groups increased to 3.8-4 after one week of treatment and then decreased to  
228 reach at week 8 the values 3.6 (BDQ), 3 (RIF) and 2.7 (RPT). In the Q203 treated  
229 groups (5/7 or 2/7), MLIs slightly increased to 3.5 after one week of treatment and then  
230 rapidly decreased to reach 1.6-1.7 at week 8. MLI in the group treated with RIF-CLR  
231 increased to 4 after one week of treatment and decreased smoothly to reach 1.4 at  
232 week 12, remained stable until week 20, but increased again afterwards to reach 2.6  
233 at week 28. MLI in the group treated with Q203-BDQ slightly increased to 3.6 after one  
234 week of treatment and decreased smoothly thereafter to reach 1.4 at week 12, a level  
235 stable till week 28. MLIs in the groups treated by Q203 combined with RIF or RPT  
236 rapidly decreased to 1.2-1.3 at week 8, and remained at this level till week 28.

237 **Fig 2. Second experiment: Evolution of mean lesion index of the swelling footpad of mice infected with *M. ulcerans* during**  
238 **8 weeks of treatment and during 20 weeks of relapse observational period.**

239 Dosages were as follow: Rifampin (RIF) 10mg/kg; Rifapentine (RPT) 20mg/kg; Bedaquiline (BDQ) 25mg/kg; Q203 5mg/kg;

240 Clarithromycin (CLR) 100mg/kg



241 **Evolution of the CFU counts (Table 2).** All untreated mice had culture-positive  
242 footpads at the time of treatment start with a mean of  $6.87 \pm 0.10 \log_{10}$  CFUs, value  
243 that remained unchanged at week 2 and 4. All treated mice remained culture positive  
244 after 2 weeks of treatment but CFU counts were significantly lower in all treated groups  
245 compared to those in untreated group. Moreover, CFU counts were lower ( $p \leq 0.01$ ) in  
246 RPT, Q203 and in the 4 combined treatment groups than in RIF and BDQ groups. After  
247 4 weeks of treatment, part of the mice became culture negative especially in the groups  
248 treated with Q203-RPT and Q203-BDQ where CFU counts were very low ( $\sim 0.2 \log_{10}$ ).  
249 CFU counts at 4 weeks remained lower ( $p < 0.05$ ) in RPT and Q203 than in RIF and  
250 BDQ groups and were lower in Q203-RPT and Q203-BDQ groups than in Q203-RIF  
251 and RIF-CLR groups. After 8 weeks of treatment, all of the mice treated with Q203  
252 alone or combined with RIF 5/7 or RPT 2/7 or BDQ 2/7 became culture negative. Few  
253 mice remained culture positive in RIF, RPT and RIF-CLR groups with very low mean  
254 CFU counts ( $< 0.5 \log_{10}$ ) but all were still culture positive in the BDQ group ( $1.28 \pm 0.93$   
255  $\log_{10}$ ).

256 During the 20 weeks observation period after stopping the treatment, no bacteriological  
257 relapse was observed in the 3 groups treated with Q203 combinations whereas 8 / 26  
258 mice treated with RIF-CLR relapsed with a mean CFU count of  $0.87 \pm 0.93 \log_{10}$ .

259 **Table 2.** Results of footpad cultures during the treatment of mice infected with *M. ulcerans* (2, 4 and 8 weeks) and relapse rate after  
 260 treatment completion.

| Regimen <sup>a</sup> | Results during treatment |                          |                         |                          |                         |                          |                         |                          |                         |                          |
|----------------------|--------------------------|--------------------------|-------------------------|--------------------------|-------------------------|--------------------------|-------------------------|--------------------------|-------------------------|--------------------------|
|                      | D0                       |                          | 2w                      |                          | 4w                      |                          | 8w                      |                          | 28w                     |                          |
|                      | Culture positivity rate  | Mean (±SD) CFU per group | Culture positivity rate | Mean (±SD) CFU per group | Culture positivity rate | Mean (±SD) CFU per group | Culture positivity rate | Mean (±SD) CFU per group | Culture positivity rate | Mean (±SD) CFU per group |
| Untreated control    | 9/9                      | 6.87±0.10                | 8/8 <sup>b</sup>        | 7.00±0.16                | 6/6 <sup>b</sup>        | 6.84±0.35                |                         |                          |                         |                          |
| RIF 5/7              |                          |                          | 9/9                     | 5.71±0.65                | 6/6 <sup>c</sup>        | 2.78±0.81                | 2/8 <sup>c</sup>        | 0.44±0.81                |                         |                          |
| RPT 2/7              |                          |                          | 8/9                     | 4.18±1.71                | 3/9                     | 0.63±1.03                | 1/9                     | 0.20±0.59                |                         |                          |
| BDQ 2/7              |                          |                          | 7/7 <sup>d</sup>        | 6.12±0.31                | 7/7 <sup>d</sup>        | 5.48±0.14                | 5/5 <sup>d</sup>        | 1.28±0.93                |                         |                          |
| Q203 2/7             |                          |                          | 9/9                     | 4.88±0.42                | 5/9                     | 1.42±1.21                | 0/9                     |                          |                         |                          |
| Q203 5/7             |                          |                          | 9/9                     | 4.90±0.29                | 7/9                     | 0.74±0.79                | 0/9                     |                          |                         |                          |
| RIF-CLR 5/7          |                          |                          | 9/9                     | 4.42±0.55                | 6/7 <sup>e</sup>        | 1.15±0.84                | 1/8 <sup>e</sup>        | 0.22±0.63                | 8/26 <sup>e</sup>       | 0.87±1.36                |
| Q203-RIF 5/7         |                          |                          | 9/9                     | 4.52±0.36                | 9/9                     | 1.20±1.04                | 0/8 <sup>f</sup>        |                          | 0/30                    |                          |
| Q203-BDQ 2/7         |                          |                          | 9/9                     | 4.65±0.75                | 2/9                     | 0.17±0.51                | 0/9                     |                          | 0/30                    |                          |

|                          |  |  |     |           |     |           |     |  |      |  |
|--------------------------|--|--|-----|-----------|-----|-----------|-----|--|------|--|
| <b>Q203-<br/>RPT 2/7</b> |  |  | 9/9 | 4.40±0.78 | 2/9 | 0.25±0.49 | 0/9 |  | 0/30 |  |
|--------------------------|--|--|-----|-----------|-----|-----------|-----|--|------|--|

261

262 <sup>a</sup>: treatments was began 6 weeks after inoculation of 4.6 log<sub>10</sub> per footpad when the infected swelling footpads reached a lesion index  
 263 between 2 and 3. Drugs were administered 2 or 5 times a week and dosages were as follow: Rifampin (RIF) 10mg/kg; Rifapentine  
 264 (RPT) 20mg/kg; Bedaquiline (BDQ) 25mg/kg; Q203 5mg/kg; Clarithromycin (CLR) 100mg/kg.

265 <sup>b</sup>: footpad cultures were contaminated due to advanced lesion for 1 mouse in the untreated control group 2 weeks and 1 mouse in  
 266 the group 4 weeks.

267 <sup>c</sup>: footpad cultures were contaminated due to advanced lesion for 3 mice in the RIF group 4 weeks and 1 mouse in the group 8  
 268 weeks.

269 <sup>d</sup>: footpad cultures were contaminated due to advanced lesion for 1 mouse in the BDQ group 2 weeks, 2 mice in the group 4 weeks  
 270 and 2 mice in the group 8 weeks; 2 mice died due to an accident of gavage in the group 8 weeks.

271 <sup>e</sup>: footpad cultures were contaminated due to advanced lesion for 2 mice in the RIF-CLR group 4 weeks and 3 mice in the relapse  
 272 observation group; 1 mouse died due to an accident of gavage in the group 8 weeks and in the relapse observation group,  
 273 respectively.

274 <sup>f</sup>: 1 mouse died due to an accident of gavage in the Q203-RIF group 8 weeks.

## 275 **MIC of *M. ulcerans* bacilli recovered from relapsing mice**

276 MICs remained unchanged against bacilli isolated from the 8 relapsing mice in the RIF-  
277 CLR treated group when compared to initial MICs against *M. ulcerans* Cu001 *i.e.* 0.5-  
278 1 µg/ml for RIF, and 0.5 µg/ml for CLR (for the latter, same value on 7H11 and MH  
279 media).

280

## 281 **Discussion**

282 Although Buruli ulcer can be successfully treated by a two-month antibiotic  
283 combination regimen administered daily, new shorter and/or intermittent regimens,  
284 would greatly simplify treatment management in the field.

285 Our 1<sup>st</sup> screening experimental *in vivo* study aimed at identifying newer bactericidal  
286 drugs. Indeed, available data on activity of several new drugs against *M. tuberculosis*  
287 or *M. ulcerans* justifying a systematic evaluation in a BU mouse model that has been  
288 successfully used for many years for this purpose [8]. Ivermectine, selamectine and  
289 tedizolid were not bactericidal after 4 weeks of treatment and failed to prevent mortality  
290 in 8 weeks. The doses used in our experiment were drawn from available  
291 pharmacokinetic data. Ivermectine, a long lasting drug in human (half-life 15-19h) and  
292 in mice (9h) was shown when used in mice at a dose of 0.2mg/kg to yield serum  
293 concentration lower than that obtained in human at standard therapeutic dose [12]. We  
294 therefore used a higher dose (1 mg/kg) that, still, failed to control infection in our model.  
295 Same unfavorable result was obtained with selamectine used at a dose of 12mg/kg as  
296 proposed in previous publication [19]. However, it has been suggested that these two  
297 avermectin compounds might be used safely at higher doses [12], which could be  
298 evaluated in future studies. The dose of tedizolid TDZ used in the present study, 10  
299 mg/kg, was shown to yield in mice pharmacokinetics close to that obtained in human

300 at the therapeutic dose of 200mg [20–22]. Contrasting with the deceiving results  
301 obtained with tedizolid, and as reported in a previous work [8], a marked bactericidal  
302 activity was obtained with linezolid, an oxazolidinone included in the experiment as a  
303 positive control for tedizolid. Surprisingly, PBTZ169 was not bactericidal in our BU  
304 model at 25 mg/kg, a dose shown to be active against *M. tuberculosis* in mice [15]. Yet  
305 *M. ulcerans*, as *M. tuberculosis*, carries a cysteine at the position 387 in DprE1, that  
306 codes for the target of benzothiazinones, but not a serine or an alanine, which has  
307 been shown to confer a natural resistance to PBTZ in *M. avium* or *M. aurum* [16]. Thus,  
308 the reason for the disappointing result obtained with PBTZ in our BU model is unclear.

309 RIF and RIF-STR were highly bactericidal as in all our preceding works [17]. Q203  
310 drastically reduced the lesion index and CFU counts after 4 weeks of treatment and all  
311 mice became culture negative after 8 weeks. These results obtained with Q203 were  
312 significantly better than those obtained with the historical positive control RIF alone  
313 and even with the reference combination regimen RIF-STR.

314 Although drugs with low bactericidal activity when given in monotherapy might be of  
315 interest when used in combination with other drugs, and since our goal was to obtain  
316 the most effective combination regimen, we selected for the 2<sup>nd</sup> experiment  
317 combinations of drugs shown to be highly active separately. The results of this  
318 experiment demonstrated that regimens combining Q203 with RIF or RPT or BDQ  
319 were not only bactericidal, making all the mice culture negative after 8 weeks of  
320 treatment, but also sterilized the mice footpads and prevented relapse during an  
321 observation period of 20 weeks after stopping the treatment. Importantly, these  
322 impressive results were obtained when administrating twice weekly during 8 weeks,  
323 i.e. after a total of only 16 doses, the combinations of Q203 with either RPT or BDQ,  
324 all long lasting drugs (serum half-life in mice after single dose: Q203 23 h, RPT 25 h,

325 BDQ 53 h). Recently, regimens combining RPT), with CLR or BDQ, administered twice  
326 weekly during 8 weeks were found as bactericidal and as sterilizing as daily RPT-CLR  
327 regimen [4].

328 The fact that, in the present work, few bacilli were still found by culture in 1/8 mice after  
329 8 weeks of treatment with RIF-CLR 5/7, and that 8/26 mice relapsed within 20 weeks  
330 after the end of this regimen was surprising since bactericidal and sterilizing activity of  
331 such regimen was shown in two previous studies [17,18]. The susceptibility to RIF and  
332 to CLR of the bacilli isolated from relapsing mice was unchanged, ruling out the  
333 selection of resistant mutants during treatment. Relapses could be explained by an  
334 unusually high inoculum reached in the present work when compared to those in the  
335 previous studies, i.e. 3-4 times higher at the start of treatment and 4-10 times higher  
336 after 2-4 weeks in untreated mice. Nevertheless, this fact strengthens further the good  
337 results obtained with the Q203 combined regimens.

338 New drugs are rare for the treatment of BU. The last active new marketed drug was  
339 BDQ, initially experimented with success in tuberculosis, and found later on to be very  
340 active against *M.ulcerans* in BU animal model [17]. Therefore, the excellent *in vivo*  
341 activity of Q203 against *M. ulcerans* constitutes a step forward. The reason of this  
342 promising result has been elucidated in a recent study: reductive evolution in most  
343 strains of this species led to hyper susceptibility to Q203 by eliminating alternate  
344 terminal electron acceptors and thus making the target *cyt-bc1:aa3* crucial for survival  
345 [12].

346 Triple combinations of Q203, administered at the higher dose of 10 mg/kg, either with  
347 RPT and clofazimine, RPT and BDQ or BDQ and clofazimine, as well as quadruple  
348 combination of these four drugs, were recently found to be sterilizing after 2 weeks of  
349 daily treatment in BU animal model [19], leading to the conclusion that targeting the

350 *M. ulcerans* respiratory chain with several drugs is an efficient strategy for designing  
351 new shorter treatments of BU. In the present study, we demonstrated that double  
352 combinations of Q203 at 5 mg/kg with either RPT or BDQ, thanks to the long half-life  
353 and good bio availabilities of these drugs, provided very promising results for future  
354 fully oral intermittent regimens which would greatly simplify BU treatments in the field.  
355

## 356 **References**

- 357 1. WHO | Provisional guidance on the role of specific antibiotics in the management of  
358 *Mycobacterium ulcerans* disease (Buruli ulcer). In: WHO [Internet]. [cited 17 Apr 2014].  
359 Available: <http://www.who.int/buruli/information/antibiotics/en/>
- 360 2. Ji B, Chauffour A, Robert J, Jarlier V. Bactericidal and sterilizing activities of several orally  
361 administered combined regimens against *Mycobacterium ulcerans* in mice. *Antimicrob Agents*  
362 *Chemother.* 2008;52: 1912–1916. doi:10.1128/AAC.00193-08
- 363 3. Chauty A, Ardant M-F, Marsollier L, Pluschke G, Landier J, Adeye A, et al. Oral treatment for  
364 *Mycobacterium ulcerans* infection: results from a pilot study in Benin. *Clin Infect Dis.* 2011;52:  
365 94–96. doi:10.1093/cid/ciq072
- 366 4. Lim LE, Vilcheze C, Ng C, Jacobs WR, Ramon-Garcia S, Thompson CJ. Anthelmintic  
367 Avermectins Kill *Mycobacterium tuberculosis*, Including Multidrug-Resistant Clinical Strains.  
368 *Antimicrob Agents Chemother.* 2013;57: 1040–1046. doi:10.1128/AAC.01696-12
- 369 5. Omansen TF, Porter JL, Johnson PDR, van der Werf TS, Stienstra Y, Stinear TP. In-vitro  
370 Activity of Avermectins against *Mycobacterium ulcerans*. Johnson C, editor. *PLoS Negl Trop*  
371 *Dis.* 2015;9: e0003549. doi:10.1371/journal.pntd.0003549
- 372 6. Scherr N, Pluschke G, Thompson CJ, Ramón-García S. Selamectin Is the Avermectin with the  
373 Best Potential for Buruli Ulcer Treatment. Johnson C, editor. *PLoS Negl Trop Dis.* 2015;9:  
374 e0003996. doi:10.1371/journal.pntd.0003996
- 375 7. Molina-Torres CA, Barba-Marines A, Valles-Guerra O, Ocampo-Candiani J, Cavazos-Rocha N,  
376 Pucci MJ, et al. Intracellular activity of tedizolid phosphate and ACH-702 versus  
377 *Mycobacterium tuberculosis* infected macrophages. *Ann Clin Microbiol Antimicrob.* 2014;13:  
378 13. doi:10.1186/1476-0711-13-13



- 379 8. Ji B, Lefrançois S, Robert J, Chauffour A, Truffot C, Jarlier V. In Vitro and In Vivo Activities of  
380 Rifampin, Streptomycin, Amikacin, Moxifloxacin, R207910, Linezolid, and PA-824 against  
381 *Mycobacterium ulcerans*. *Antimicrob Agents Chemother*. 2006;50: 1921–1926.  
382 doi:10.1128/AAC.00052-06
- 383 9. Burdette SD, Trotman R. Tedizolid: The First Once-Daily Oxazolidinone Class Antibiotic.  
384 Saravolatz LD, editor. *Clin Infect Dis*. 2015;61: 1315–1321. doi:10.1093/cid/civ501
- 385 10. Makarov V, Lechartier B, Zhang M, Neres J, van der Sar AM, Raadsen SA, et al. Towards a new  
386 combination therapy for tuberculosis with next generation benzothiazinones. *EMBO Mol Med*.  
387 2014;6: 372–383. doi:10.1002/emmm.201303575
- 388 11. Makarov V, Manina G, Mikusova K, Mollmann U, Ryabova O, Saint-Joanis B, et al.  
389 Benzothiazinones Kill *Mycobacterium tuberculosis* by Blocking Arabinan Synthesis. *Science*.  
390 2009;324: 801–804. doi:10.1126/science.1171583
- 391 12. Scherr N, Bieri R, Thomas SS, Chauffour A, Kalia NP, Schneide P, et al. Targeting the  
392 *Mycobacterium ulcerans* cytochrome bc1:aa3 for the treatment of Buruli ulcer. *Nat Commun*.  
393 2018;9: 5370. doi:10.1038/s41467-018-07804-8
- 394 13. Shepard CC. The experimental disease that follows the injection of human leprosy bacilli into  
395 foot-pads of mice. *J Exp Med*. 1960;112: 445–454.
- 396 14. Dega H, Bentoucha A, Robert J, Jarlier V, Grosset J. Bactericidal Activity of Rifampin-  
397 Amikacin against *Mycobacterium ulcerans* in Mice. *Antimicrob Agents Chemother*. 2002;46:  
398 3193–3196. doi:10.1128/AAC.46.10.3193-3196.2002
- 399 15. Lefrançois S, Robert J, Chauffour A, Ji B, Jarlier V. Curing *Mycobacterium ulcerans* infection in  
400 mice with a combination of rifampin-streptomycin or rifampin-amikacin. *Antimicrob Agents*  
401 *Chemother*. 2007;51: 645–650. doi:10.1128/AAC.00821-06

- 402 16. Incandela ML, Perrin E, Fondi M, de Jesus Lopes Ribeiro AL, Mori G, Moiana A, et al. *DprE1* ,  
403 a new taxonomic marker in mycobacteria. FEMS Microbiol Lett. 2013;348: 66–73.  
404 doi:10.1111/1574-6968.12246
- 405 17. Chauffour A, Robert J, Veziris N, Aubry A, Jarlier V. Sterilizing Activity of Fully Oral  
406 Intermittent Regimens against Mycobacterium Ulcerans Infection in Mice. Small PLC, editor.  
407 PLoS Negl Trop Dis. 2016;10: e0005066. doi:10.1371/journal.pntd.0005066
- 408 18. Ji B, Chauffour A, Robert J, Lefrançois S, Jarlier V. Orally Administered Combined Regimens  
409 for Treatment of Mycobacterium ulcerans Infection in Mice. Antimicrob Agents Chemother.  
410 2007;51: 3737–3739. doi:10.1128/AAC.00730-07
- 411 19. Converse PJ, Almeida DV, Tyagi S, Xu J, Nuermberger EL. Shortening Buruli ulcer treatment  
412 with combination therapy targeting the respiratory chain and exploiting *M. ulcerans* gene decay.  
413 Antimicrob Agents Chemother. 2019; AAC.00426-19, aac;AAC.00426-19v1.  
414 doi:10.1128/AAC.00426-19

415

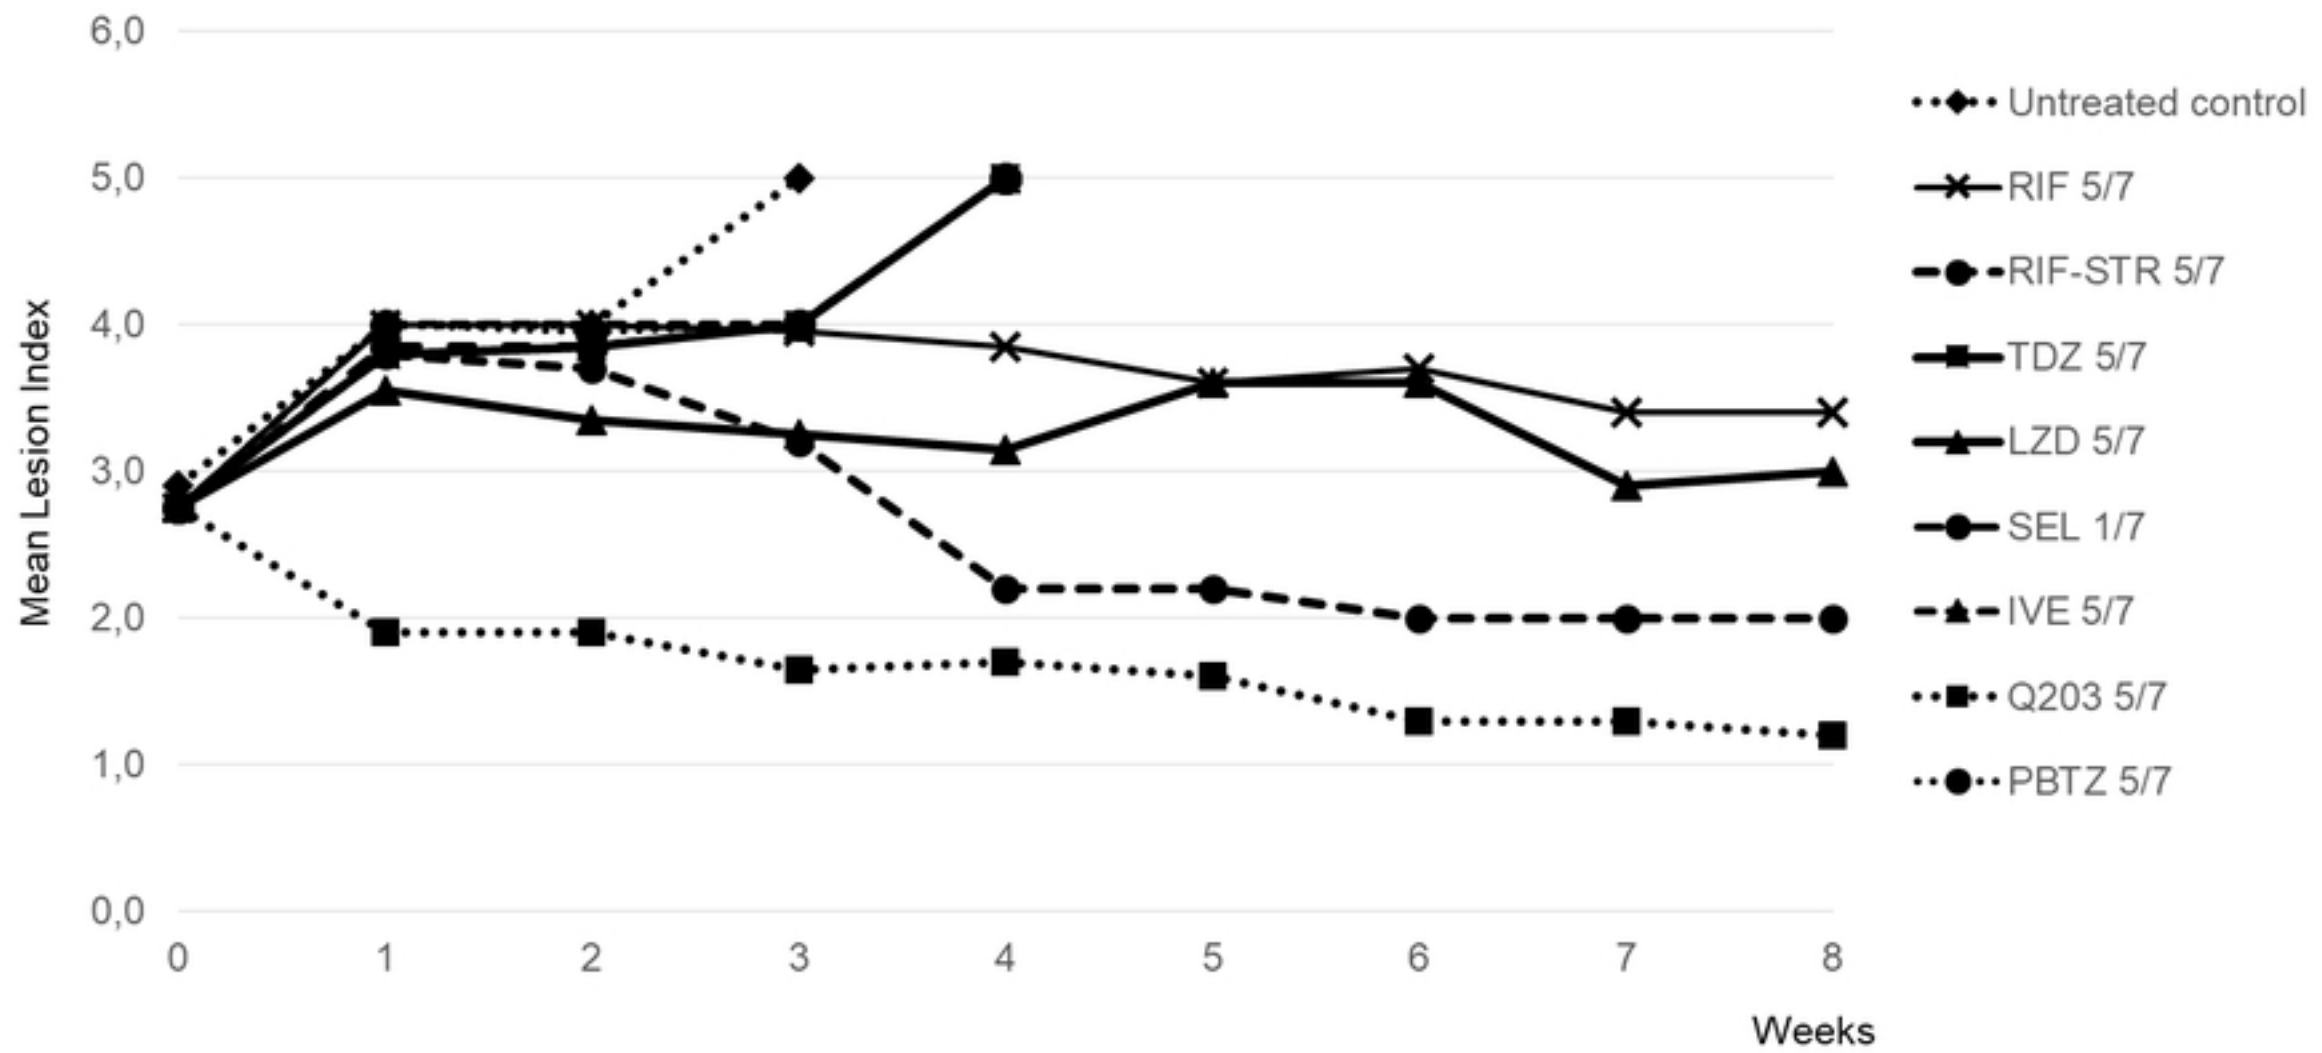

Figure

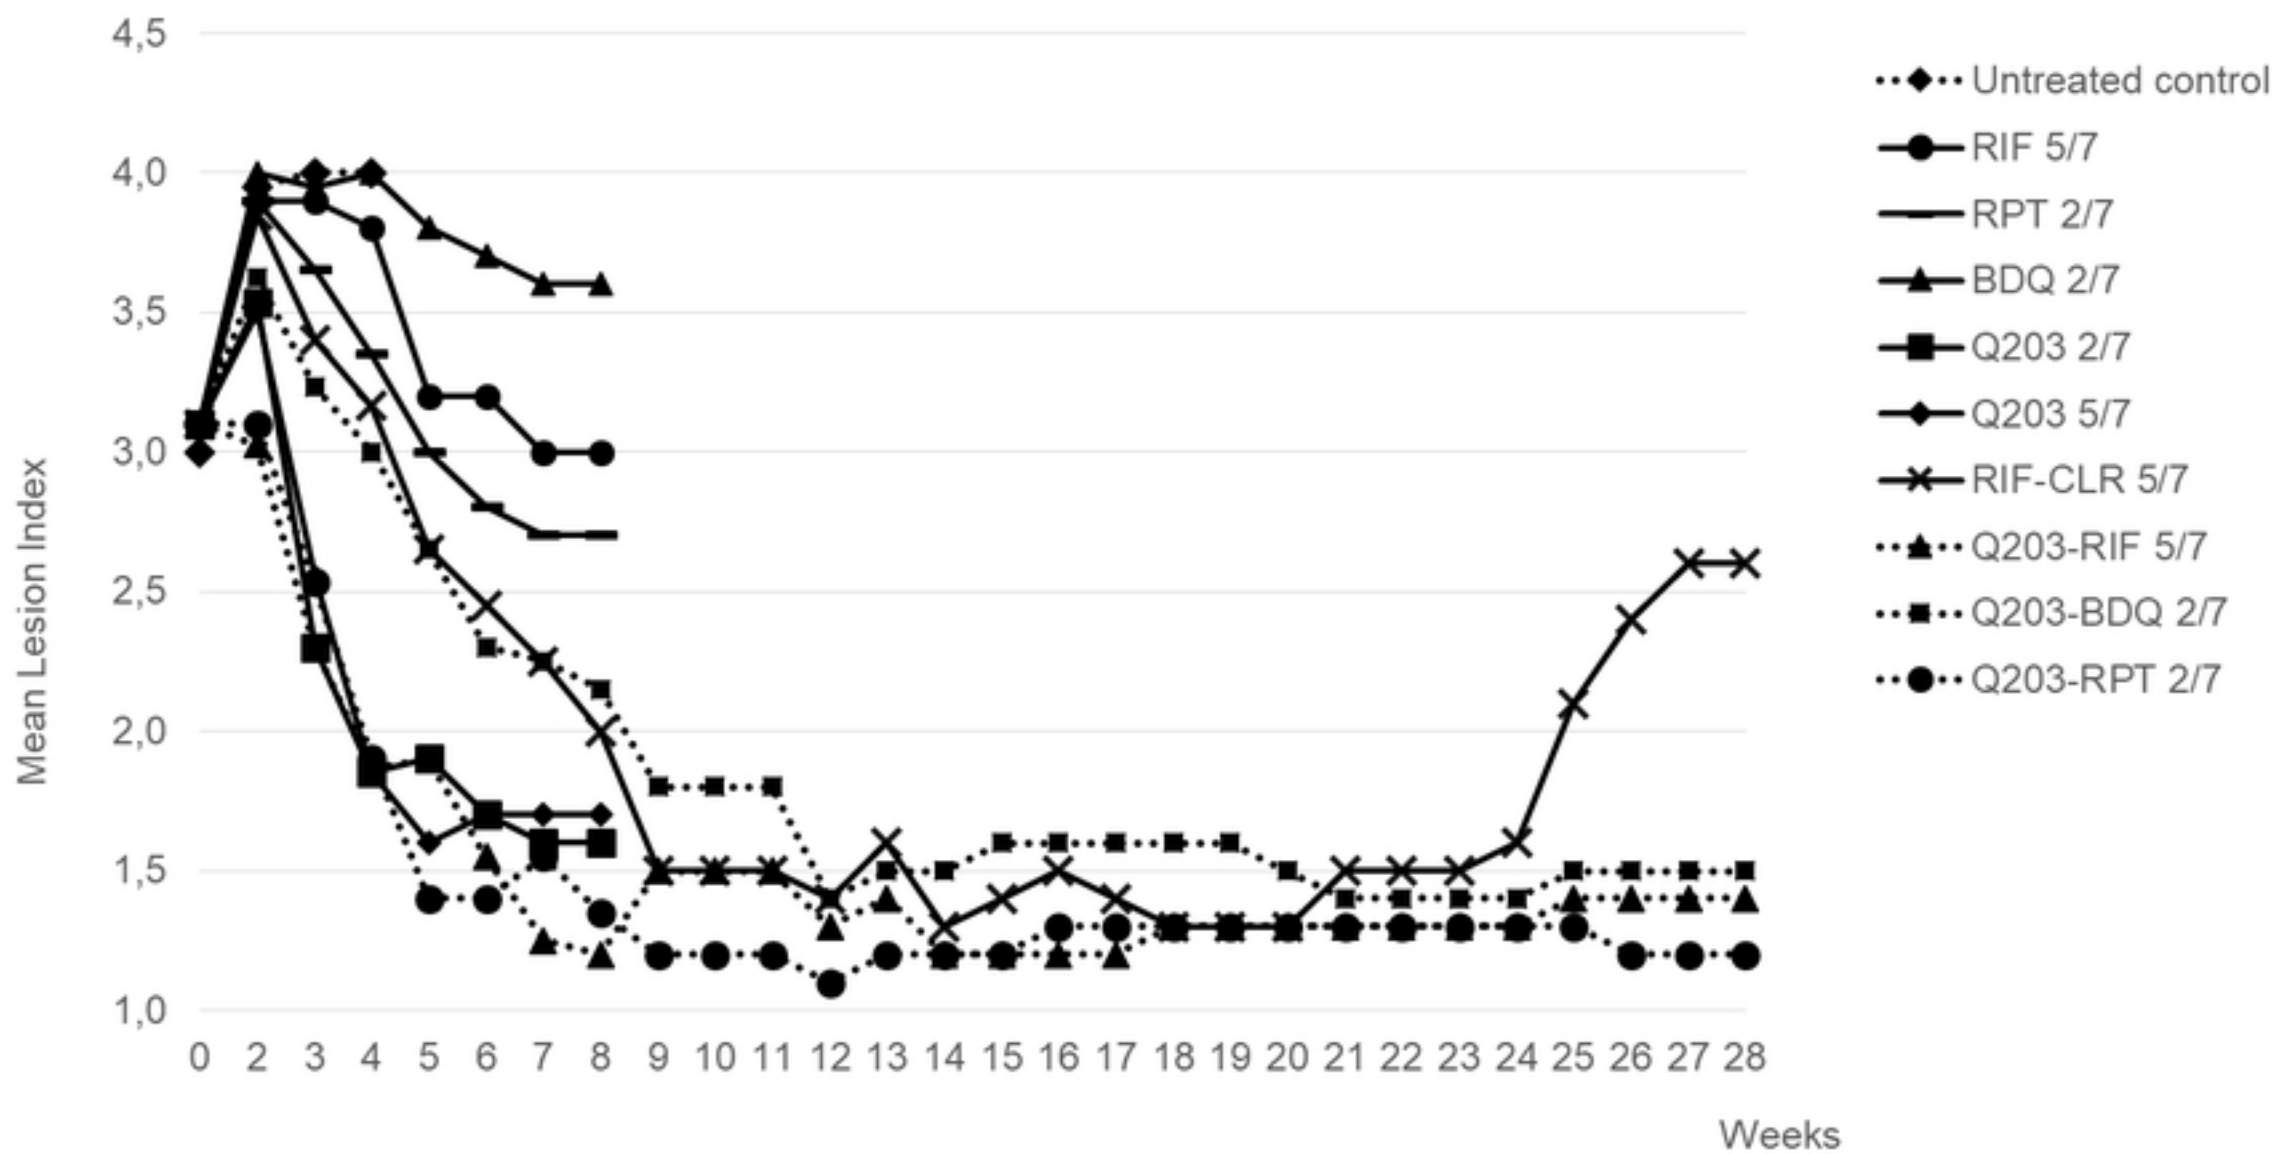

Figure
